# Supplementary material
Source: publisher site journal article supplement (https://www.dovepress.com/article/356475)
Supplement: Supplementary file 1 [file get_supplementary_file.php]

**Supplementary Table 1 Total** Biomarkers for Predicting AKI Development

|  | **AUC (95% CI)** | **Cutoff value** | **Sensitivity (%)** | **Specificity (%)** | ***P* value** |
| --- | --- | --- | --- | --- | --- |
| sPD-1 (pg/ml) | 0.856 (0.825-0.958) | 105.161 | 83.333 (57.735-95.593) | 80.000 (68.394-88.256) | <0.001 |
| sPD-L1 (pg/ml) | 0.906 (0.764-0.921) | 49.513 | 94.444 (70.625-99.709) | 81.429 (69.977-89.365) | <0.001 |
| Urine NGAL (ng/ml) | 0.660 (0.551-0.757) | 45.740 | 66.667 (41.155-85.643) | 81.429 (69.977-89.365) | 0.038 |
| Urine [TIMP-2]*[IGFBP7] ((ng/ml)2/1000) | 0.675 (0.541-0.810) | 0.323 | 61.111 (36.140-81.737) | 68.571 (56.236-78.852) | 0.022 |

**Abbreviations:** AKI, acute kidney injury; CI, confidence interval; sPD-1, soluble programmed cell death protein 1; sPD-L1, soluble programmed death-legand 1; NGAL, neutrophil gelatinase-associated lipocalin; TIMP-2, tissue inhibitor of metalloproteinases-2; IGFBP7, insulin-like growth factor binding protein 7. AUC, area under the receiver operating characteristic; CI, confidence interval.

**Supplementary Table 2** Multivariate Analysis ofClinical Risk Factors for AKI Development

| **Variables** | **Crude OR (95% CI)** | **Adjusted OR (95% CI)** | ***P* value** |
| --- | --- | --- | --- |
| Baseline creatinine | 0.964 (0.939-0.991) |  | 0.074 |
| Estimated blood loss | 0.999 (0.999-1.000) | 0.999 (0.999-1.000) | 0.054 |
| Use of vasopressors | 4.932 (1.485-16.375) |  | 0.171 |
| SOFA score | 0.767 (0.647-0.909) |  | 0.627 |
| APACHE II score | 0.869 (0.797-0.948) | 0.857 (0.774-0.949) | 0.003 |
| SCr at ICU admission | 0.959 (0.931-0.987) | 0.957 (0.926-0.990) | 0.011 |

**Abbreviations:** AKI, acute kidney injury; CI, confidence interval; APACHE II, acute physiologic and chronic health evaluation II; SCr, serum creatinine; SOFA, sequential organ failure assessment.

.


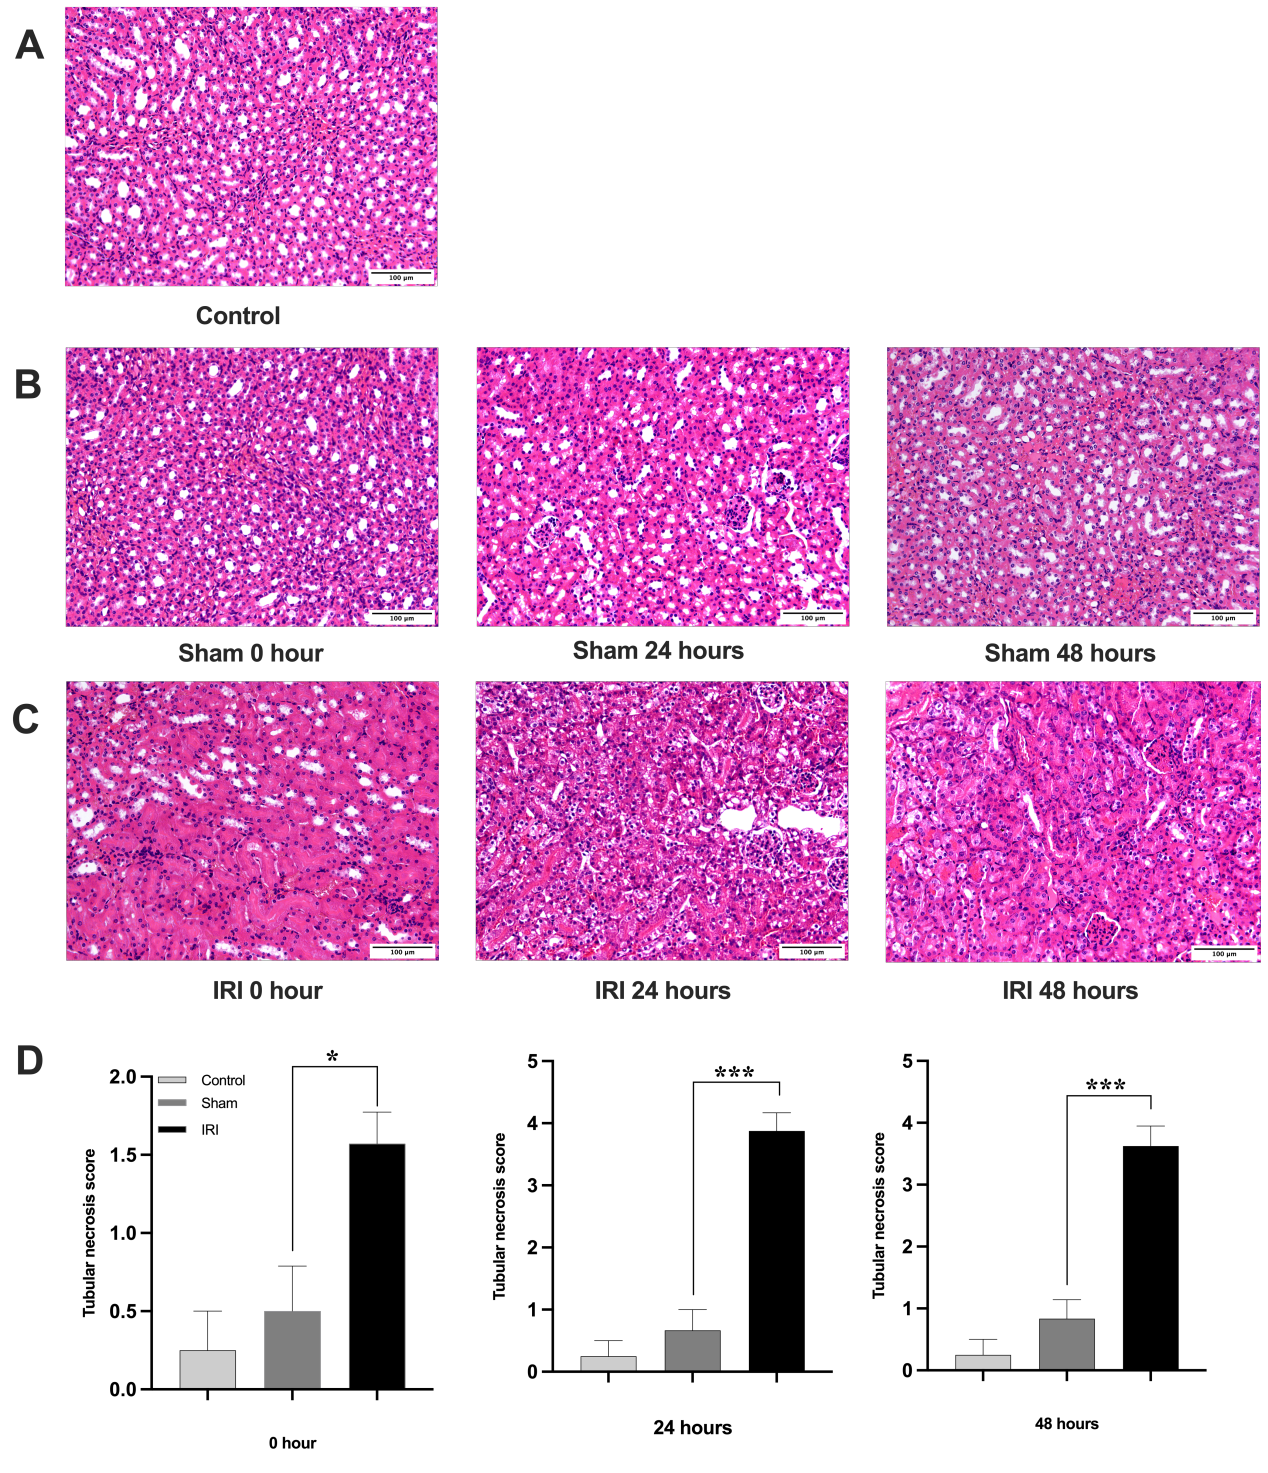


**Supplementary** **Figure 1** Histopathology of kidney tissues in mice. Histopathology of kidney tissues was shown in control group (A), sham group (B), and IRI group (C) 0h, 24h, 48h after surgery. Images, × 200; original scale bar, 100 μm. Comparison of tubular necrosis scores was shown between IRI group and sham group 0h, 24, 48h after surgery (D). Data are expressed as mean ± standard deviation. Difference between IRI group and sham group was made using unpaired Student’ s *t*-test for normally distributed data.*****p<0.05. *******p<0.001

**Abbreviations:** IRI, ischemia-reperfusion injury.
